# Supplementary material for: Potential Involvement of Platelet-Derived Microparticles and Microparticles Forming Immune Complexes during Monocyte Activation in Patients with Systemic Lupus Erythematosus
Source: PubMed Central journal article supplement (PMC5837989; doi:10.3389/fimmu.2018.00322), 2018-03-01
Supplement: image_2.pdf [file image_2.pdf]

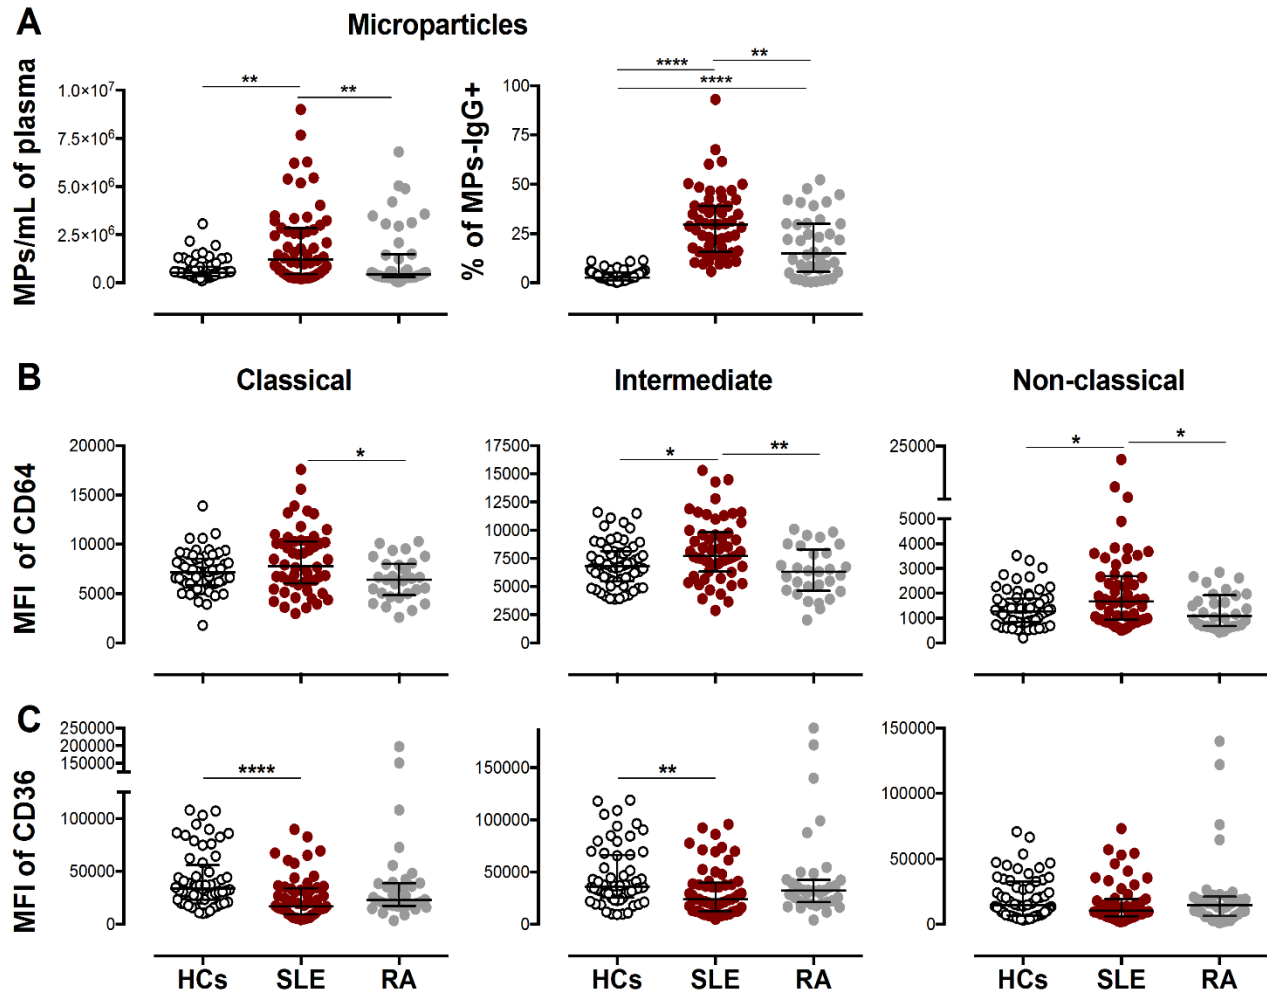

**Supplementary Figure 2. Levels of circulating MPs and monocyte subsets in total patients with SLE differ from those in patients with RA. (A)** Total MP number (left panel) and frequency (right panel) of circulating MPs-IgG<sup>+</sup> in plasma from total patients with SLE (n=60), patients with RA (n=40), and HCs (n=60). The MFI of **(B)** CD64, and **(C)** CD36 on classical, intermediate and non-classical monocytes from patients with SLE (n=60), patients with RA (n=40), and HCs (n=40) are shown. Kruskal-Wallis test and Dunn's *post-hoc* test \*p<0.05, \*\*p<0.01, \*\*\*p<0.001 and \*\*\*\*p<0.0001.
